# Supplementary material
Source: publisher figshare collection journal article supplement (https://karger.figshare.com/articles/dataset/_/5414557)
Supplement: Supplementary file 1 [file 1]

Archive with 3 entries (3 files):
- NEO480066_sm3.pdf
- NEO480066_sm1.PDF
- NEO480066_sm2.PDF
