# Supplementary material
Source: publisher figshare collection journal article supplement (https://karger.figshare.com/articles/dataset/_/5414557)
Supplement: Supplementary file 1 [file 1 › NEO480066_sm2.PDF]

**Impact of minimally-invasive surfactant therapy in preterm infants at 29-32 weeks gestation**

**Peter A. Dargaville, Sanoj K.M. Ali, Hamish D. Jackson, Christopher Williams, Antonio G. De Paoli**

**ONLINE SUPPLEMENTAL TABLES**

|                                                     |                                                                                                        |
|-----------------------------------------------------|--------------------------------------------------------------------------------------------------------|
| <b>N</b>                                            | 37                                                                                                     |
| <b>Gestation (weeks)</b>                            | 30 (29-32)                                                                                             |
| <b>Birth weight (g)</b>                             | 1460 (1220-1610)                                                                                       |
| <b>Time of treatment (h)</b>                        | 10 (5.4-19)                                                                                            |
| <b>FiO<sub>2</sub> pre-treatment*</b>               | 0.41 (0.075)                                                                                           |
| <b>PCO<sub>2</sub> pre-treatment (mm Hg)*</b>       | 53 (9.9)                                                                                               |
| <b>RDS radiological score†</b>                      | Mild-moderate: 3 (9%)<br>Moderate: 17 (52%)<br>Moderate-severe 8 (24%)<br>Severe 5 (15%)               |
| <b>More than one catheterisation attempt</b>        | 12 (32%)                                                                                               |
| <b>SpO<sub>2</sub> below 80% for &gt;10 sec</b>     | 14 (38%)                                                                                               |
| <b>Bradycardia for &gt;10 sec</b>                   | 7 (19%)                                                                                                |
| <b>Positive pressure ventilation required</b>       | 13 (35%)                                                                                               |
| <b>Surfactant dose (mg/kg)</b>                      | 104 (99-134)                                                                                           |
| <b>FiO<sub>2</sub> 4 h after treatment*</b>         | 0.24 (0.042)‡                                                                                          |
| <b>PCO<sub>2</sub> 2 h after treatment (mm Hg)*</b> | 49 (7.6)‡                                                                                              |
| <b>Intubated at any time</b>                        | 4 (11%)                                                                                                |
| <b>Intubated in first 72 h</b>                      | 3 (8.1%)                                                                                               |
| <b>Timing and reasons for intubation</b>            | 31 h progressive RDS<br>35 h recurrent apnoea<br>43 h progressive RDS<br>176 h recurrent severe apnoea |

**Supplemental Table 1. Clinical and procedural details in infants receiving surfactant via thin catheter**

Median (interquartile range) or n (%), unless otherwise stated. \*Mean (SD). †pre-treatment X-ray available for scoring in 33 infants. ‡Differs from pre-treatment value, P<0.05, paired t-test.

|                                                     | <b>Epoch 1<br/>All infants<br/>reaching treatment<br/>threshold</b> | <b>Epoch 2<br/>All infants<br/>reaching treatment<br/>threshold</b> | <b>Epoch 2<br/>Infants treated<br/>with surfactant by<br/>thin catheter</b> |
|-----------------------------------------------------|---------------------------------------------------------------------|---------------------------------------------------------------------|-----------------------------------------------------------------------------|
| <b>N</b>                                            | 30                                                                  | 51                                                                  | 37                                                                          |
| <b>Surfactant therapy</b>                           | 14 (47%)                                                            | 46 (90%)*                                                           | 37 (100%)                                                                   |
| <b>Surfactant therapy via<br/>endotracheal tube</b> | 14 (47%)                                                            | 12 (24%)*                                                           | 2 (5.4%)                                                                    |
| <b>Duration of CPAP<br/>(days)</b>                  | 3.2 (1.9-4.9)                                                       | 4.8 (3.2-6.1)*                                                      | 4.8 (3.9-6.6)                                                               |
| <b>Any MV</b>                                       | 15 (50%)                                                            | 16 (31%)                                                            | 4 (11%)                                                                     |
| <b>Duration of MV (days)</b>                        | 0.13 (0-2.6)                                                        | 0 (0-1.6)*                                                          | 0 (0-0)                                                                     |
| <b>Average duration of<br/>MV (d per infant)</b>    | 1.6                                                                 | 1.1                                                                 | 0.53                                                                        |
| <b>Duration of CPAP + MV<br/>(days)</b>             | 5.0 (3.2-6.3)                                                       | 4.9 (3.7-6.1)                                                       | 5.0 (3.9-6.8)                                                               |
| <b>Length of hospital stay<br/>(days)</b>           | 52 (40-64)                                                          | 49 (39-60)                                                          | 52 (39-62)                                                                  |
| <b>Pneumothorax</b>                                 | 8 (27%)                                                             | 5 (9.8%)*                                                           | 0 (0%)                                                                      |
| <b>BPD</b>                                          | 0 (0%)                                                              | 2 (3.9%)                                                            | 2 (5.4%)                                                                    |
| <b>Died</b>                                         | 0 (0%)                                                              | 0 (0%)                                                              | 0 (0%)                                                                      |
| <b>Died or BPD</b>                                  | 0 (0%)                                                              | 2 (3.9%)                                                            | 2 (5.4%)                                                                    |
| <b>IVH grade III/IV</b>                             | 1 (3.3%)                                                            | 0 (0%)                                                              | 0 (0%)                                                                      |

**Supplemental Table 2. Resource consumption and outcomes – infants reaching treatment threshold (Epochs 1 and 2) and infants receiving surfactant via thin catheter (Epoch 2).**

Median (interquartile range) or n (%). \*Differs from Epoch 1,  $P < 0.05$ . Treatment threshold in Epoch 2 was CPAP  $\geq 7$  cm H<sub>2</sub>O and FiO<sub>2</sub>  $\geq 0.35$  at age  $< 24$ h. Data for Epoch 1 are from infants identified to have reached the treatment threshold even though minimally-invasive surfactant therapy was not being used during this time.
